# Supplementary material
Source: Springer Nature journal article supplement (https://www.springermedizin.de/resource/supplementary/12985_2007_238_MOESM4_ESM.pdf/9607606)

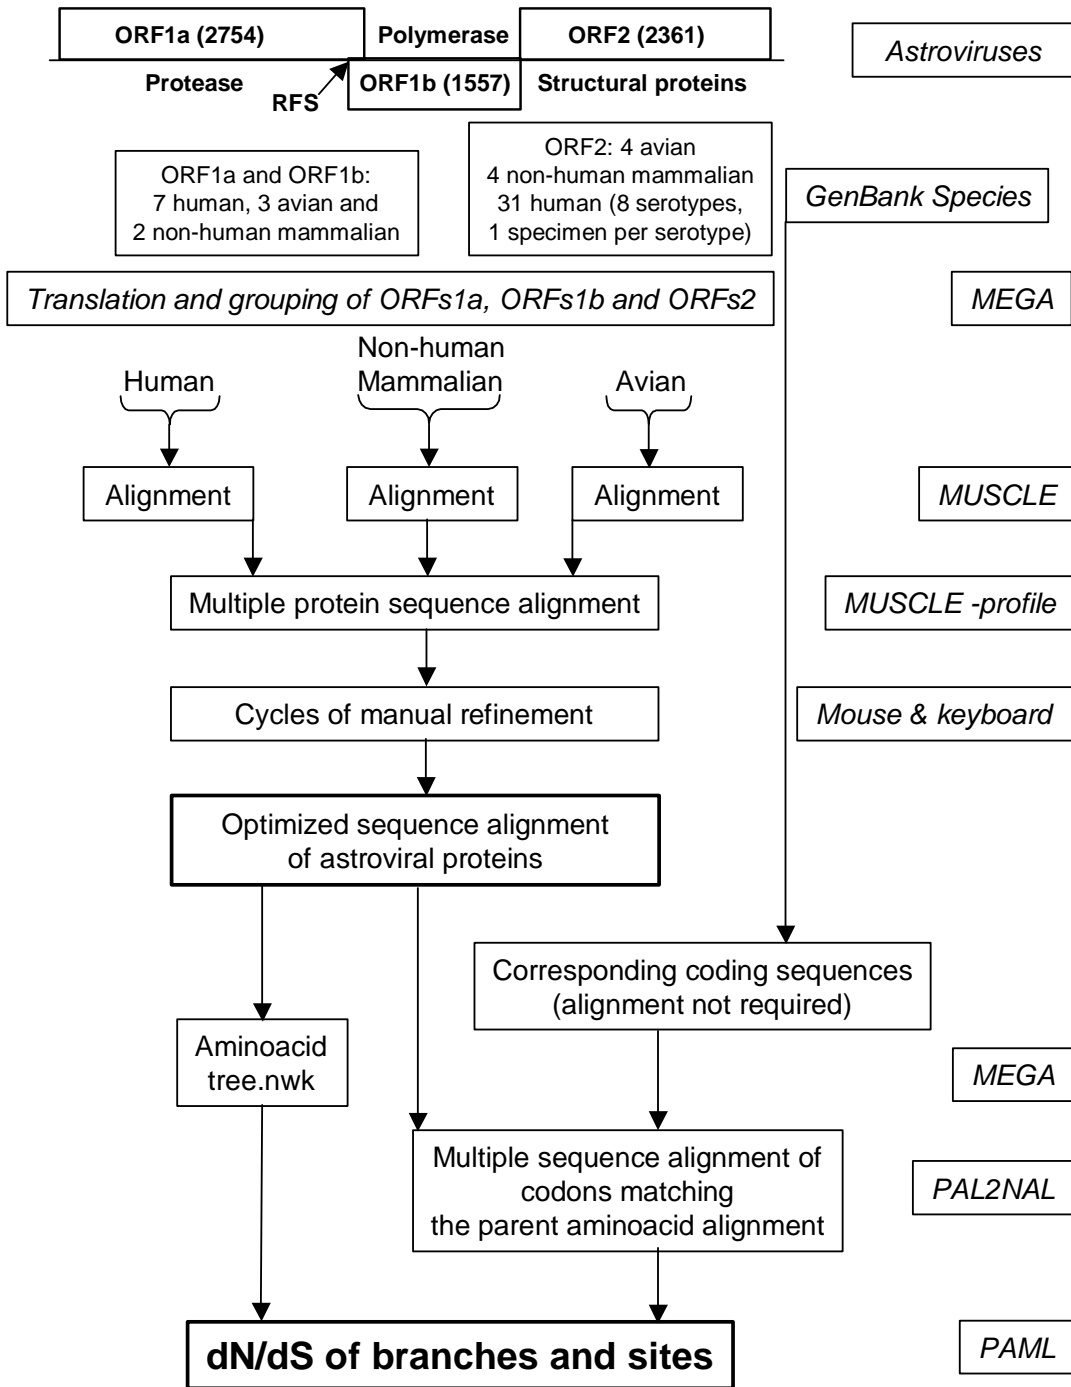

Supplement: MOESM4 [file 9607606]
